# Supplementary material for: Cellular stress response mechanisms of Rhizoma coptidis: a systematic review
Source: Chin Med. 2018 Jun 7;13:27. doi: 10.1186/s13020-018-0184-y (PMC5992750; doi:10.1186/s13020-018-0184-y)
Supplement: Supplementary file 1 — Additional file 1: Table S1. The effects of Rhizoma coptidis on NF-κB pathways (↓indicates inhibition/reduction, ↑indicates increase). [file 13020_2018_184_MOESM1_ESM.xlsx]

## Sheet: Sheet1
Target	Model of Study	Model Building	Drug	Doses	Treat Time	Underlying Mechanisms	Disease	Ref
NF-κB	BALB/c mice	TNBS	BBR	50,100 mg/kg	5,9d	NF-κB phosphorylation↓	Colitis	[1]
	3T3-L1 adipocytes	Mac-CM	BBR	10µM	1h	The translocation of NF-κB into nucleus↓	Insulin resistance	[2]
	NIT-1 cells	LPS	BBR	5μM	24h	NF-κB phosphorylation↓	Diabetes mellitus	[3]
	Rat mesangial cells	High glucose	BBR	10,30,90μM	24h	Transcription activity of NF-κB↓	Diabetic nephropathy	[4]
	SD rats	Surgery	BBR	0.75,1.5mg/mL	14d	Activities of phosphorylated NF-κB↓	Postsurgery intestinal adhesion and inflammation	[5]
	db/db mice	None	BBR	50mg/kg	10w	NF-κB expression↓	Diabetic encephalopathy	[6]
	SD rats	pMCAO	BBR	10,40 mg/kg	24h	The expression of NF-κB↓	Cerebral ischemia	[7]
	Vascular smooth muscle cells	None	BBR	100μM	6,12,24h	Activity of NF-κB↓	Vascular remodeling	[8]
	Wistar rats	Hypercholesterolemic diet	BBR	150mg/kg	12w	NF-κB-DNA binding activity↓	Chronic kidney injury	[9]
	C3H/HeN and C3H/HeJ mice	LPS	BBR	10,20mg/kg	3d	NF-κB activation in colon↓	Colitis	[10]
	C57BL/6 mice	CDE diet	BBR	10mg/kg	1,2,3d	Activation of NF-κB↓	Pancreatitis	[11]
	Microglia cells	Aβ	BBR	1,2.5,5μM	30min	NF-κB activity↓	Alzheimer's disease	[12]
	Mouse bone marrow cells	RANKL	Cop	10mM	0-30min	NF-κB phosphorylation↓	Osteoporosis	[13]
	gEECS	LPS	Pal	80,40,20μg/mL	8h	The expression of NF-κB↓	LPS-induced inflammation	[14]
MyD88	Wistar rats	High glucose and fat diet,STZ	BBR	375,187.5,93.75mg/kg/d	9w	MyD88 expression in intestine↓	Type 2 diabetes	[15]
	RAW 264.7 cells	LPS	BBR	30μM	12h	The expression of MyD88↓	Inflammation	[16]
	gEECS	LPS	Pal	80,40,20μg/mL	8h	The expression of MyD88↓	Inflammation	[14]
p65	3T3-L1 adipocytes	Mac-CM	BBR	10µM	1h	The expression of p65 in nuclear fraction↓	Insulin resistance	[2]
	Raw264.7 macrophages	LPS	BBR	1μM	24h	The expression of p65 subunit of NF-κB↓	Insulin resistance	[17]
	INS-1 cells	LPS	BBR	1.25,2.5μM	24h	The expression of p65 NF-κB↓	Diabetes mellitus	[3]
	ApoE-/- mice	None	BBR	150 mg/kg/d	12w	NF-κBp65 mRNA levels↓; NF-κB p65 protein in the nucleus↓	Atherosclerosis	[18]
	Wistar rats	Hypercholesterolemic diet	BBR	150mg/kg	12w	Levels of p65↓	Chronic kidney injury	[9]
	Human synovial fibroblasts	CCN2	BBR	20,50,100μM	1h	The expression of p65↓	Osteoarthritis	[19]
	THP-1 cells	LPS	BBR	0.01,0.1,1μM	1h	The expression of p65↓	Sepsis	[20]
	MDA-MB-231 cells	None	BBR	30,60,90µM	24h	The phosphorylation of p65 NF-κB↓	Breast cancer	[21]
	B16F-10 melanoma cells	TNF-α	BBR	2μg/mL	2h	Expression of p65↓	Cancer	[22]
	SD rats	LAD occlusion and reperfusion	Cop	3,10,30mg/kg	10min	Nucleic NF-κB p65↓;cytosolic NF-κB p65↑	Ischemia and reperfusion	[23]
	ApoE-/- mice	None	Cop	150mg/kg/d	12w	The mRNA levels of NF-κBp65 in aorta and liver↓	Arteriosclerosis	[24]
	Human articular chondrocytes	IL-1β	Cop	10μg/mL	2h	The protein levels of p-NF-κBp65↓	Osteoarthritis	[25]
	gEECS	LPS	Pal	80,40,20μg/mL	8h	The gene expression of NF-κBp65.↓	LPS-induced inflammation	[14]
p50	B16F-10 melanoma cells	TNF-α	BBR	2μg/mL	2h	Expression of p50↓	Cancer	[22]
	Wistar rats	Hypercholesterolemic diet	BBR	150mg/kg	12w	Levels of p50↓	Chronic kidney injury	[9]
c-Rel	B16F-10 melanoma cells	TNF-α	BBR	2µg/mL	2h	c-Rel levels↓	Cancer	[26]
IKK	3T3-L1 adipocytes	Mac-CM	BBR	10µM	1h	IKKβ phosphorylation↓	Insulin resistance	[2]
	C57BL/6 mice（adipose tissue）	High fat diet	BBR	50mg/kg/d	14d	IKKβ phosphorylation↓	Insulin resistance	[17]
	Raw264.7 macrophages	LPS	BBR	1μM	24h	IKKβ phosphorylation↓	Insulin resistance	[17]
	Wistar rats	High glucose and fat diet,STZ	BBR	375,187.5,93.75mg/kg/d	9w	p-IKKβ/IKKβ ratios in intestine↓	Type 2 diabetes	[15]
	Peritoneal macrophages	LPS	BBR	20μM	90min	The phosphorylation of IKKβ↓	Acute and cronic colitis	[27]
	Wistar rats	Hypercholesterolemic diet	BBR	150mg/kg	12w	Expression of phosphorylated-IKKβ↓	Chronic kidney injury	[9]
IκBα	3T3-L1 adipocytes	Mac-CM	BBR	10µM	1h	IκBα phosphorylation↓	Insulin resistance	[2]
	Peritoneal macrophages	LPS	BBR	10μM	15,30,60min	Degradation of IκB-α↓	Colitis	[10]
	ApoE-/- mice	None	BBR	150mg/kg/d	12w	IκBα levels in the cytosol↑	Atherosclerosis	[18]
	Microglia cells	Aβ	BBR	1,2.5,5μM	30min	The phosphorylation of IκBα↓	Alzheimer's disease	[12]
	ApoE-/- mice	None	Cop	150mg/kg/d	12w	Expression of cytosolic IκB-α↓	Arteriosclerosis	[24]
	Human articular chondrocytes	IL-1β	Cop	10μg/mL	2h	IκBα degradation↓	Osteoarthritis	[25]
TLR4	Wistar rats	High glucose and fat diet,STZ	BBR	375,187.5,93.75mg/kg/d	9w	TLR4 expressions in intestine↓	Type 2 diabetes	[15]
	C3H / HeN mice	TNBS	BBR	10,20mg/kg	6d	TLR-4 expression in C3H/HeN colon↓	Colitis	[10]
	Peritoneal macrophages	LPS	BBR	20μM	20min	The binding of LPS to TLR4↓	Acute and cronic colitis	[27]
	SD rats	Cecal ligation and puncture	BBR	50mg/kg	5d	The mRNA expressions of TLR4↓	Sepsis	[28]
	RAW 264.7 cells	LPS	BBR	30μM	12h	The expression of TLR-4↓	Inflammation	[16]
	Syrian golden hamsters	High fat and cholesterol diet	Cop	23.35,46.70,70.05mg/kg	33d	The mRNA expression of TLR4↓	Obesity	[29]
	L02 cells	LPS	Cop	25μg/mL	24h	The expression of TLR4↓	Liver injury	[30]
	gEECS	LPS	Pal	80,40,20μg/mL	8h	The gene expression of TLR4↓	Inflammation	[14]
LBP	Wistar rats	High glucose and fat diet,STZ	BBR	375,187.5,93.75mg/kg/d	9w	The mRNA levels of LBP↓	Type 2 diabetes	[15]
	Syrian golden hamsters	High fat and cholesterol diet	Cop	23.35,46.70,70.05mg/kg	33d	The expression of LBP↓	Obesity	[29]
CD14	Wistar rats	High glucose and fat diet,STZ	BBR	375,187.5,93.75mg/kg/d	9w	CD14 mRNA levels↓	Type 2 diabetes	[15]
	Syrian golden hamsters	High fat and cholesterol diet	Cop	23.35,46.70,70.05mg/kg	33d	The mRNA expression of CD14↓	Obesity	[29]
CK	HeLa cells	None	BBR	0.3mM	12,24,48h	CK activities↓	Cervical carcinoma	[31]
	SD rats	MI/R surgery	BBR	200mg/kg/d	2w	Serum CK levels↓	Ischemic heart disease	[32]
	SD rats	Ischemia,reperfusion	Pal	25,50mg/kg	1h	CK levels in serum↓	Ischemia–reperfusion injury	[33]
IRAK	Peritoneal macrophages	LPS	BBR	20μM	90min	The phosphorylation of IRAK1↓	Acute and cronic colitis	[27]
ICAM-1	ApoE-/- mice	None	BBR	150mg/kg/d	12w	mRNA levels of ICAM-1 in the aorta↓	Atheroscleroscis	[18]
	Wistar rats	Obese-diet and high sugar drinking	BBR	50mg/kg/d	8w	The expression of ICAM-1↓	Metabolic syndrome	[34]
	ApoE-/- mice	None	Cop	150mg/kg/d	12w	The mRNA levels of ICAM-1 in aorta and liver↓	Arteriosclerosis	[24]
TNF-α	BALB/c mice	TNBS	BBR	50,100mg/kg	5,9d	Levels of TNF-α in local colon and sera↓	Colitis	[1]
	3T3-L1 adipocytes	Mac-CM	BBR	10µM	1h	The production of TNF-α↓	Insulin resistance	[2]
	Male C57BL/6 mice	High fat diet	BBR	50mg/kg/d	14d	The levels of TNF-α in adipose tissue↓	Insulin resistance	[17]
	Raw264.7 macrophages	LPS	BBR	1μM	24h	The expressions of TNF-α↓	Insulin resistance	[17]
	NIT-1 cells	LPS	BBR	1.25, 2.5,5μM	24h	The levels of TNF-α↓	Diabetes mellitus	[3]
	SD rats	Obdominal operation	BBR	0.75,1.5mg/mL	14d	The expression of TNF-α↓	Intestinal adhesion	[5]
	Wistar rats	High glucose and fat diet,STZ	BBR	375,187.5,93.75mg/kg/d	9w	TNF-α mRNA levels↓	Type 2 diabetes	[15]
	db/db mice	None	BBR	50mg/kg	10w	TNF-α expressions↓	Diabetic encephalopathy	[6]
	BV-2 microglia cells	IFN-γ or LPS	BBR	1,3,10μM	30min	TNF-α expression↓	Neuroinflammation	[35]
	ApoE-/- mice	None	BBR	150mg/kg/d	12w	TNF-α levels in the aorta↓	Atherosclerosis	[18]
	Peritoneal macrophages	LPS	BBR	20μM	24h	The expression of TNF-α↓	Acute and cronic colitis	[27]
	C57BL/6 mice	CDE diet	BBR	10mg/kg	1,2,3d	The expression of TNF-α↓	Pancreatitis	[11]
	Wistar rats	Obese-diet and high sugar drinking	BBR	50mg/kg/d	8w	The expression of TNF-α↓	Metabolic syndrome	[34]
	SD rats	LAD occlusion and reperfusion	Cop	3,10,30mg/kg	10min	TNF-α in heart tissue↓	Ischemia and reperfusion	[23]
	ApoE-/- mice	None	Cop	150mg/kg/d	12w	The serum levels of TNF-α↓	Arteriosclerosis	[24]
	ICR mice	GalN/LPS	Pal	25,50,100,200mg/kg	1h	TNF-α mRNA expression↓	Hepatic failure	[36]
IL-6	3T3-L1 adipocytes	Mac-CM	BBR	10µM	1h	The production of IL-6↓	Insulin resistance	[2]
	C57BL/6 mice	High fat diet	BBR	50mg/kg/d	14d	The levels of IL-6 in adipose tissue↓	Insulin resistance	[17]
	Raw264.7 macrophages	LPS	BBR	1μM	24h	The expressions of IL-6↓	Insulin resistance	[17]
	NIT-1 cells	LPS	BBR	1.25,2.5,5μM	24h	The levels of IL-6↓	Diabetes mellitus	[3]
	Microglia cells	Aβ	BBR	1,2.5,5μM	30min	IL-6 production↓	Alzheimer's disease	[12]
	SD rats	Obdominal operation	BBR	0.75,1.5mg/mL	14d	The expression of IL-6↓	Intestinal adhesion	[5]
	BV-2 microglia cells	IFN-γ or LPS	BBR	1,3,10μM	30min	IL-6 expression↓	Neuroinflammation	[35]
	ApoE-/- mice	None	BBR	150mg/kg/d	12w	mRNA levels of IL-6 in the aorta↓	Atherosclerosis	[18]
	peritoneal macrophages	LPS	BBR	20μM	24h	The expression of IL-6↓	Acute and cronic colitis	[27]
	C57BL/6 mice	CDE diet	BBR	10mg/kg	1,2,3d	The expression of IL-6↓	Pancreatitis	[11]
	SD rats	Cecal ligation and puncture	BBR	50mg/kg	5d	Serum IL-6 concentrations↓	Sepsis	[28]
	C57BL/6 mice	B16F-10 melanoma cells	BBR	10mg/kg	10d	IL-6 levels↓	Cancer	[22]
	C57BL/6 mice	B16F-10 cells	BBR	5doses×10mg/kg/d	5d	IL-6 levels↓	Cancer	[26]
	ApoE-/- mice	None	Cop	150mg/kg/d	12w	IL-6 levels in serum↓;IL-6 mRNA levels in aorta and liver↓	Arteriosclerosis	[24]
IL-1β	SD rats	Obdominal operation	BBR	0.75,1.5mg/mL	14d	The expressions of IL-1β↓	Intestinal adhesion	[5]
	BV-2 microglia cells	IFN-γ or LPS	BBR	1,3,10μM	30min	IL-1β expression↓	Neuroinflammation	[35]
	ApoE-/- mice	None	BBR	150mg/kg/d	12w	Aerum levels of IL-1β↓	Atherosclerosis	[18]
	Wistar rats	High glucose and fat diet,STZ	BBR	375,187.5,93.75mg/kg/d	9 w	IL-1β mRNA levels↓	Type 2 diabetes	[15]
	Peritoneal macrophages	LPS	BBR	20μM	24h	The expression of IL-1β↓	Acute and cronic colitis	[27]
	Human synovial fibroblasts	CCN2	BBR	20,50,100μM	24h	mRNA and protein expression of IL-1β↓	Osteoarthritis	[19]
	SD rats	Collagenase	BBR	10,50mg/kg	30d	Serum IL-1β levels↓	Osteoarthritis	[19]
	C57BL/6 mice	CDE diet	BBR	10mg/kg	1,2,3d	The expression of IL-1β↓	Pancreatitis	[11]
	C57BL/6 mice	B16F-10 melanoma cells	BBR	10mg/kg	10d	IL-1β levels↓	Cancer	[22]
	ApcMin/+ mice	High-fat diet	Pal	10,20mg/kg/d	10-22w	IL-1β in the small intestine,colon and serum↓	Colorectal cancer	[37]
	SD rats	LAD occlusion and reperfusion	Cop	3,10,30mg/kg	10min	IL-1β in heart tissue↓	Ischemia and reperfusion	[23]
	ApoE-/- mice	None	Cop	150mg/kg/d	12w	IL-1β mRNA levels in aorta and liver↓	Arteriosclerosis	[24]
TF	Human aortic endothelial cells	TNF-α	BBR	1,3,10,30μM	1h	TF expression↑	Arterial thrombosis	[38]
	ApoE-/- mice	TNF-α	BBR	100mg/kg/d	10d	TF activity↑	Arterial thrombosis	[38]
	THP-1 cells	LPS	BER	0.01,0.1,1μM	1h	TF activity and expression↓	Sepsis	[20]
Bcl-2	SH-SY5Y cells	High glucose	BBR	0.1–10nM	24h	Bcl-2 expression↑	Diabetic neuropathy	[39]
	NSC34 cells	H2O2	BBR	10nM	30min	Bcl-2 expression↑	Neuronal injury	[40]
	MDA-MB-231 cells	None	BBR	30,60,90µM	24h	The protein expression of Bcl-2↓	Breast cancer	[21]
	Human NSCLC A549 and H1299 cells	None	BBR	20,100µM	48h	The expression levels of Bcl-2 proteins↓	Cancer	[41]
	HeLa cells	None	BBR	0.3mM	12,24,48h	Bcl-2 mRNA and protein expressions↓	Cervical carcinoma	[31]
	Thyroid carcinoma cells	None	BBR	20,80μM	48h	Ratio of Bcl-2↓	Thyroid carcinoma	[42]
	L02 and HepG2 cells	LPS	Cop	25μg/mL	24h	The expression of Bcl-2↓	Liver injury	[30]
	SD rats	LAD occlusion and reperfusion	Cop	3,10,30mg/kg	10min	Bcl-2 expression↑	Ischemia and reperfusion	[23]
COX-2	Microglia cells	Aβ	BBR	1,2.5,5μM	30min	COX-2 expression↓	Alzheimer's disease	[12]
	BV-2 microglia cells	IFN-γ or LPS	BBR	1,3,10μM	30min	COX-2 expression↓	Neuroinflammation	[35]
	B16F-10 melanoma cells	None	BBR	2μg/mL	4h	The expression of COX-2↓	Cancer	[26]
	Human articular chondrocytes	IL-1β	Cop	2.5,5,10μg/mL	2h	The protein expression of COX-2↓	Osteoarthritis	[25]
	SD rats	30min ischemia,6h reperfusion	Pal	25,50mg/kg	1h	COX-2 proteins in myocardial tissues↓	Ischemia–reperfusion injury	[33]
iNOS	ApoE-/- mice	None	BBR	150mg/kg/d	12w	mRNA levels of iNOS in the aorta↓	Atherosclerosis	[18]
	Microglia cells	Aβ	BBR	1,2.5,5μ M	30min	iNOS expression↓	Alzheimer's disease	[12]
	BV-2 microglia cells	IFN-γ or LPS	BBR	1,3,10μM	30min	iNOS expression↓	Neuroinflammation	[35]
	Male C3H/HeN mice	TNBS	BBR	10,20 mg/kg	3d	The expression of iNOS↓	Colitis	[10]
	Wistar rats	Hypercholesterolemic diet	BBR	150mg/kg	12w	The expression of iNOS↓	Chronic kidney injury	[9]
	Peritoneal macrophages	LPS	BBR	1,5,10μM	1h	The gene expression of iNOS↓	Inflamation	[43]
	C57BL/6mice	Cerulein	BBR	1,5,10mg/kg	1h	iNOS expression↓	Acute pancreatitis	[11]
	B16F-10 melanoma cells	None	BBR	2μg/mL	4h	The expression of iNOS↓	Cancer	[26]
	Human articular chondrocytes	IL-1β	Cop	2.5,5,10μg/mL	2h	the protein expression of iNOS↓	Osteoarthritis	[25]
	Murine macrophage RAW 264.7 cells	LPS	Cop	30μM	1h	Levels of iNOS mRNA and protein↓	Inflammation	[16]
	SD rats	30min ischemia,6h reperfusion	Pal	25,50mg/kg	1h	iNOS proteins in myocardial tissues↓	Ischemia–reperfusion injury	[33]
NO	BALB/c mice（spleen）	LPS	BBR	50mg/kg	3d	LPS-induced NO production↓	Sepsis	[44]
	C57BL/6mice	Cerulein	BBR	5,10mg/kg	1h	NO production↓	Acute pancreatitis	[11]
	gEECS	LPS	Pal	80,40,20μg/mL	8h	NO production ↓	Inflammation	[14]
VCAM-1	Wistar rats	Obese-diet and high sugar drinking	BBR	50mg/kg/d	8w	The expression of VCAM-1↓	Metabolic syndrome	[34]
	Umbilical vein endothelial cells	TNFa or oxLDL	BBR	5μM	8h	The expression of VCAM-1↓	Endothelial dysfunction	[45]
	ApoE-/- mice	None	Cop	150mg/kg/d	12w	VCAM-1 mRNA levels in aorta and liver↓	Arteriosclerosis	[24]
u-PA	Vascular smooth muscle cells	None	BBR	100μM	6,12,24h	mRNA and protein levels of u-PA↓	Vascular remodeling	[8]
MMP	Vascular smooth	None	BBR	100μM	6,12,24h	mRNA and protein levels of MMP-2 and MMP-9↓	Vascular remodeling	[8]
	Wistar rats	Obese-diet and high sugar drinking	BBR	50mg/kg/d	8w	The levels of MMP-2↓	Metabolic syndrome	[34]
	Human articular chondrocytes	IL-1β	Cop	2.5,5,10μg/ml	2h	The expression of MMP-3 and MMP-13↓	Osteoarthritis	[25]
	ST2 cells	1a,25(OH)2D3	Cop	1,10,20,,40mM	2d	The expressions of RANKL↓	Osteoporosis	[13]
RANKL	MC3T3-E1 cells	LPS	Pal	1-100μM	24h	RANKL expression↓	Osteoporosis	[46]
	Osteoblastic ST2 cells	1α,25-(OH)2D3	Pal	0-40mM	48h	The expression of RANKL↓	Osteoporosis	[47]
References
1	Li, C., et al., Berberine ameliorates TNBS induced colitis by inhibiting inflammatory responses and Th1/Th17 differentiation. Mol Immunol, 2015.67(2 Pt B):444-54.
2	Zhao, W., et al., Nandinine, a Derivative of Berberine, Inhibits Inflammation and Reduces Insulin Resistance in Adipocytes via Regulation of AMP-Kinase Activity. Planta Med, 2017.83(3-04):203-9.
3	Wang, Y., Attenuation of berberine on lipopolysaccharide-induced inflammatory and apoptosis responses in beta-cells via TLR4-independent JNK/NF-kappaB pathway. Pharm Biol, 2013.52(4):532-8.
4	Lan, T., et al., Berberine attenuates high glucose-induced proliferation and extracellular matrix accumulation in mesangial cells: involvement of suppression of cell cycle progression and NF-kappaB/AP-1 pathways. Mol Cell Endocrinol, 2014.384(1-2):109-16.
5	Zhang, Y., et al., Berberine hydrochloride prevents postsurgery intestinal adhesion and inflammation in rats. J Pharmacol Exp Ther, 2014.349(3):417-26.
6	Li, H.Y., et al., Berberine Improves Diabetic Encephalopathy through SIRT1/ER Stress Pathway in db/db Mice. Rejuvenation Research, 2017.
7	Zhang, X., et al., Neuroprotection of early and short-time applying berberine in the acute phase of cerebral ischemia: up-regulated pAkt, pGSK and pCREB, down-regulated NF-kappaB expression, ameliorated BBB permeability. Brain Res, 2012.1459:61-70.
8	Liu, S.-J., et al., Berberine suppresses in vitro migration of human aortic smooth muscle cells through the inhibitions of MMP-2/9, u-PA, AP-1, and NF-κB. BMB Reports, 2014.47(7):388-92.
9	Wan, X., et al., Berberine ameliorates chronic kidney injury caused by atherosclerotic renovascular disease through the suppression of NFkappaB signaling pathway in rats. PLoS One, 2013.8(3):e59794.
10	Lee, I.A., Y.J. Hyun, and D.H. Kim, Berberine ameliorates TNBS-induced colitis by inhibiting lipid peroxidation, enterobacterial growth and NF-kappaB activation. Eur J Pharmacol, 2010.648(1-3):162-70.
11	Choi, S.B., et al., Berberine inhibits inflammatory mediators and attenuates acute pancreatitis through deactivation of JNK signaling pathways. Mol Immunol, 2016.74:27-38.
12	Jia, L., et al., Berberine suppresses amyloid-beta-induced inflammatory response in microglia by inhibiting nuclear factor-kappaB and mitogen-activated protein kinase signalling pathways. J Pharm Pharmacol, 2012.64(10):1510-21.
13	Yokozawa, T., et al., Coptidis Rhizoma: protective effects against peroxynitrite-induced oxidative damage and elucidation of its active components. J. Pharm. Pharmacol., 2004.56(4):547-56.
14	Yan, B., et al., Palmatine inhibits TRIF-dependent NF-kappaB pathway against inflammation induced by LPS in goat endometrial epithelial cells. Int Immunopharmacol, 2017.45:194-200.
15	Gong, J., et al., Berberine Attenuates Intestinal Mucosal Barrier Dysfunction in Type 2 Diabetic Rats. Front Pharmacol, 2017.8:42.
16	Wu, J., et al., Coptisine from Coptis chinensis inhibits production of inflammatory mediators in lipopolysaccharide-stimulated RAW 264.7 murine macrophage cells. Eur J Pharmacol, 2016.780:106-14.
17	Ye, L., et al., Inhibition of M1 macrophage activation in adipose tissue by berberine improves insulin resistance. Life Sci, 2016.166:82-91.
18	Feng, M., et al., Comparative effect of berberine and its derivative 8-cetylberberine on attenuating atherosclerosis in ApoE(-/-) mice. Int Immunopharmacol, 2017.43:195-202.
19	Liu, S.C., et al., Berberine attenuates CCN2-induced IL-1beta expression and prevents cartilage degradation in a rat model of osteoarthritis. Toxicol Appl Pharmacol, 2015.289(1):20-9.
20	Gao, M.Y., et al., Berberine inhibits LPS-induced TF procoagulant activity and expression through NF-kappaB/p65, Akt and MAPK pathway in THP-1 cells. Pharmacol Rep, 2014.66(3):480-4.
21	Li, X., et al., Berberine hydrochloride IL-8 dependently inhibits invasion and IL-8-independently promotes cell apoptosis in MDA-MB-231 cells. Oncol Rep, 2014.32(6):2777-88.
22	Hamsa, T.P. and G. Kuttan, Berberine inhibits pulmonary metastasis through down-regulation of MMP in metastatic B16F-10 melanoma cells. Phytother Res, 2012.26(4):568-78.
23	Guo, J., et al., Coptisine protects rat heart against myocardial ischemia/reperfusion injury by suppressing myocardial apoptosis and inflammation. Atherosclerosis, 2013.231(2):384-91.
24	Feng, M., et al., The protective effect of coptisine on experimental atherosclerosis ApoE-/- mice is mediated by MAPK/NF-κB-dependent pathway. Biomedicine & Pharmacotherapy, 2017.93:721-9.
25	Zhou, K., et al., Coptisine Prevented IL-beta-Induced Expression of Inflammatory Mediators in Chondrocytes. Inflammation, 2016.39(4):1558-65.
26	Hamsa, T.P. and G. Kuttan, Antiangiogenic activity of berberine is mediated through the downregulation of hypoxia-inducible factor-1, VEGF, and proinflammatory mediators. Drug Chem Toxicol, 2012.35(1):57-70.
27	Jeong, J.J., et al., The Rhizome Mixture of Anemarrhena asphodeloides and Coptidis chinensis Ameliorates Acute and Chronic Colitis in Mice by Inhibiting the Binding of Lipopolysaccharide to TLR4 and IRAK1 Phosphorylation. Evid Based Complement Alternat Med, 2014.2014:809083.
28	Li, G.X., et al., Berberine Prevents Intestinal Mucosal Barrier Damage During Early Phase of Sepsis in Rat through the Toll-Like Receptors Signaling Pathway. Korean J Physiol Pharmacol, 2015.19(1):1-7.
29	Zou, Z.Y., et al., Coptisine attenuates obesity-related inflammation through LPS/TLR-4-mediated signaling pathway in Syrian golden hamsters. Fitoterapia, 2015.105:139-46.
30	Chai, F.N., et al., Protective effect of Coptisine from Rhizoma Coptidis on LPS/D-GalN-induced acute liver failure in mice through up-regulating expression of miR-122. Biomedicine & Pharmacotherapy, 2018.98:180-90.
31	Lu, B., et al., Cytotoxicity of berberine on human cervical carcinoma HeLa cells through mitochondria, death receptor and MAPK pathways, and in-silico drug-target prediction. Toxicol In Vitro, 2010.24(6):1482-90.
32	Zhao, G.L., et al., Berberine protects rat heart from ischemia/reperfusion injury via activating JAK2/STAT3 signaling and attenuating endoplasmic reticulum stress. Acta Pharmacol Sin, 2016.37(3):354-67.
33	Youngmin, K., et al., Palmatine from Coptidis rhizoma reduces ischemia-reperfusion-mediated acute myocardial injury in the rat. Food & Chemical Toxicology, 2009.47(8):2097-102.
34	Li, X.X., et al., Berberine attenuates vascular remodeling and inflammation in a rat model of metabolic syndrome. Biological & Pharmaceutical Bulletin, 2015.38(6):862-8.
35	Lu, D.Y., et al., Berberine suppresses neuroinflammatory responses through AMP-activated protein kinase activation in BV-2 microglia. J Cell Biochem, 2010.110(3):697-705.
36	Lee, W.C., et al., Palmatine attenuates d -galactosamine/lipopolysaccharide-induced fulminant hepatic failure in mice. Food & Chemical Toxicology An International Journal Published for the British Industrial Biological Research Association, 2010.48(1):222-8.
37	Wei-Kun, M.A., et al., Palmatine fromMahonia bealeiattenuates gut tumorigenesis in ApcMin/+mice via inhibition of inflammatory cytokines. Molecular Medicine Reports, 2016.14(1):491-8.
38	Holy, E.W., et al., Berberine, a natural lipid-lowering drug, exerts prothrombotic effects on vascular cells. J Mol Cell Cardiol, 2009.46(2):234-40.
39	Hsu, Y.Y., Y.T. Tseng, and Y.C. Lo, Berberine, a natural antidiabetes drug, attenuates glucose neurotoxicity and promotes Nrf2-related neurite outgrowth. Toxicol Appl Pharmacol, 2013.272(3):787-96.
40	Hsu, Y.Y., et al., Berberine activates Nrf2 nuclear translocation and protects against oxidative damage via a phosphatidylinositol 3-kinase/Akt-dependent mechanism in NSC34 motor neuron-like cells. Eur J Pharm Sci, 2012.46(5):415-25.
41	Fu, L., et al., Berberine Targets AP-2/hTERT, NF-κB/COX-2, HIF-1α/VEGF and Cytochrome-c/Caspase Signaling to Suppress Human Cancer Cell Growth. Plos One, 2013.8(7):e69240.
42	Li, L., et al., Berberine could inhibit thyroid carcinoma cells by inducing mitochondrial apoptosis, G0/G1 cell cycle arrest and suppressing migration via PI3K-AKT and MAPK signaling pathways. Biomed Pharmacother, 2017.95:1225-31.
43	Lee, D., et al., Inhibitory effects of berberine on lipopolysaccharide-induced inducible nitric oxide synthase and the high-mobility group box 1 release in macrophages. Biochem Biophys Res Commun, 2013.431(3):506-11.
44	Li, H., et al., Yohimbine enhances protection of berberine against LPS-induced mouse lethality through multiple mechanisms. Plos One, 2012.7(12):e52863.
45	Caliceti, C., et al., Novel role of the nutraceutical bioactive compound berberine in lectin-like OxLDL receptor 1-mediated endothelial dysfunction in comparison to lovastatin. Nutr Metab Cardiovasc Dis, 2017.27(6):552-63.
46	Ishikawa, S., et al., Influence of Palmatine on Bone Metabolism in Ovariectomized Mice and Cytokine Secretion of Osteoblasts. Vivo, 2015.29(6):671-7.
47	Lee, J., et al., Palmatine Attenuates Osteoclast Differentiation and Function through Inhibition of Receptor Activator of Nuclear Factor-kappa B Ligand Expression in Osteoblast Cells. Biological & Pharmaceutical Bulletin, 2010.33(10):1733-9.
