# Supplementary material for: Cellular stress response mechanisms of Rhizoma coptidis: a systematic review
Source: Chin Med. 2018 Jun 7;13:27. doi: 10.1186/s13020-018-0184-y (PMC5992750; doi:10.1186/s13020-018-0184-y)
Supplement: Supplementary file 2 — Additional file 2: Table S2. The effects of Rhizoma coptidis on MAPK pathways (↓indicates inhibition/reduction, ↑indicates increase). [file 13020_2018_184_MOESM2_ESM.xlsx]

## Sheet: Sheet1
Target	Model of Study	Model Building	Drug	Doses	Treat	Underlying Mechanisms	Disease	Ref
					Time
JNK	Male C57BL/6 mice	High fat diet	BBR	50mg/kg/d	14d	JNK phosphorylation in adipose tissue↓	Insulin resistance	[1]
	Raw264.7 macrophages	LPS	BBR	1μM	24h	JNK phosphorylation↓	Insulin resistance	[1]
	Human aortic endothelial cells	TNF-α	BBR	30μM	1h	JNK phosphorylation↓	Arterial thrombosis	[2]
	Wistar rats	High fat diet,STZ	BBR	100mg/kg	24w	The expression of JNK↓	Diabetic neuropathy	[3]
	SD rats	Obdominal operation	BBR	0.75,1.5mg/mL	14d	The expression of JNK↓	Intestinal adhesion	[4]
	SD rats	Oxygen and glucose deprivation	BBR	10μM	24h	JNK phosphorylation levels in hippocampal↓	Brain ischemia	[5]
	ApoE −/− mice	TNF-α	BBR	100mg/kg/d	10d	JNK phosphorylation↓	Arterial thrombosis	[2]
	ARPE-19 cells	TNF-a	BBR	25μM	1h	Phosphorylation of JNK↓	Intraocular inflammation	[6]
	Peritoneal macrophages	LPS	BBR	10μM	60min	The activation of p-JNK↓	Colitis	[7]
	C57BL/6 mice	CDE diet	BBR	10mg/kg	2,3d	The phosphorylated JNK↓	Pancreatitis	[8]
	THP-1 cells	LPS	BBR	0.01,0.1,1μM	1h	The expression of JNK↓	Sepsis	[9]
	MDA-MB-231 cells	None	BBR	30,60,90µM	24h	The phosphorylation of JNK↑	Breast cancer	[10]
	BALB/c nude mice	HCT-116 cells	Cop	150 mg/kg	25d	The expression of JNK in tumors↑	Colorectal cancer	[11]
	ApoE-/- mice	None	Cop	150mg/kg/d	12w	The expressions of p-JNK1/2↓	Arteriosclerosis	[12]
	BALB/c nude mice	HCT-116 cells	Cop	150 mg/kg	25d	The expression of JNK in lungs↑	Colorectal cancer	[11]
	RAW 264.7 cells	LPS	Cop	30μM	4h	The expression of p-JNK/JNK↓	Inflammation	[13]
p38	Mesangial cells	High glucose	BBR	30,90μM	24h	The levels of phospho-p38MAPK↓	Diabetic nephropathy	[14]
	Wistar rats	High fat diet,STZ	BBR	100mg/kg	24w	The expression of p38↓	Diabetic neuropathy	[3]
	Microglia cells	Aβ	BBR	1,2.5,5μM	30min	The levels of p-P38↓	Alzheimer's disease	[15]
	SH-SY5Y cells	6-OHDA	BBR	10µM	24h	p38 activation↓	Parkinson’s disease	[16]
	ARPE-19 Cells	TNF-α	BBR	25μM	1h	Phosphorylation of p38↓	Intraocular inflammatory	[6]
	Peritoneal macrophages	LPS	BBR	10μM	60min	The activation of p-p38↓	Colitis	[7]
	Human synovial fibroblasts	CCN2	BBR	20,50,100μM	1h	The expression of p38↓	Osteoarthritis	[17]
	Articular chondrocytes	None	BBR	10,30,50μM	24h	p-p38↓	Osteoarthritis	[18]
	Articular chondrocytes	None	BBR	50μM	10min-24h	p-p38↓	Osteoarthritis	[18]
	C57BL/6 mice	CDE diet	BBR	10mg/kg	2,3d	The phosphorylated p38↓	Pancreatitis	[8]
	Wistar rats	Obese-diet and high sugar drinking	BBR	50mg/kg/d	8w	The levels of p38 MAPK↓	Metabolic syndrome	[19]
	THP-1 cells	LPS	BBR	0.01,0.1,1μM	1h	The expression of p38↓	Sepsis	[9]
	MDA-MB-231 cells	None	BBR	30,60,90µM	24h	The phosphorylation of p38MAPK↑	Breast cancer	[10]
	BALB/c nude mice	HCT-116 cells	Cop	150 mg/kg	25d	The expression of p38 in tumors↓	Colorectal cancer	[11]
	BALB/c nude mice	HCT-116 cells	Cop	150 mg/kg	25d	The expression of p38 in lungs↓	Colorectal cancer	[11]
	ApoE-/- mice	None	Cop	150mg/kg/d	12w	The protein expressions of p-p38↓	Arteriosclerosis	[12]
	RAW 264.7 cells	LPS	Cop	1-30μM	4h	The expression of p- p38/p38↓	Inflammation	[13]
ERK	Microglia cells	Aβ	BBR	1,2.5,5μM	30min	The levels of p-ERK↓	Alzheimer's disease	[15]
	BV-2 microglia cells	IFN-γ or LPS	BBR	1,3,10μM	30min	ERK activation ↓	Neuroinflammation	[20]
	B16F10 melanoma cells	α‑MSH	BBR	10µg/ml	3d	The phosphorylation of ERK↓	Melanin synthesis	[21]
	Vascularsmoothmuscle cells	Mechanical injury	BBR	120μM	10min	ERK activation↓	Coronary artery disease	[22]
	ARPE-19 Cells	TNF-α	BBR	25μM	1h	Phosphorylation of ERK↓	Intraocular inflammatory	[6]
	Peritoneal macrophages	LPS	BBR	10μM	60min	The activation of p-ERK↓	Colitis	[7]
	C57BL/6 mice	CDE diet	BBR	10mg/kg	1,2,3d	The phosphorylated ERK↓	Pancreatitis	[8]
	THP-1 cells	LPS	BBR	0.1,1μM	1h	The expression of ERK↓	Sepsis	[9]
	C57BL/6 mice	B16F-10 melanoma cells	BBR	10mg/kg	10d	Expression of ERK-2↓	Cancer	[23]
	BALB/c nude mice	HCT-116 cells	Cop	150 mg/kg	25d	The expression of ERK in lungs↓	Colorectal cancer	[11]
	HCT-116 cells	None	Cop	1,2.5,5,10mg/mL	24 h	The expression of ERK↓	Colorectal cancer	[11]
	BALB/c nude mice	HCT-116 cells	Cop	150 mg/kg	25d	The expression of ERK in tumors↓	Colorectal cancer	[11]
	RAW 264.7 cells	LPS	Cop	1-30μM	12h	ERK phosphorylation↓	Inflammation	[13]
	3T3-L1 preadipocytes	None	EBBR	12.5,25,50μM	3d	ERK1/2 phosphorylation in the early stage of differentiation↓	Obesity	[24]
c-jun	Glomerular mesangial cells	High-glucose	BBR	10,30,90μM	2h	The phosphorylation of c-Jun↓	Diabetic nephropathy	[25]
	Vascular smooth muscle cells	None	BBR	100μM	6,12,24h	Activity of c-Jun↓	Vascular remodeling	[26]
c-Raf	3T3-L1 preadipocytes	None	EBBR	12.5,2,50μM	3d	c-Raf phosphorylation in the early stage of differentiation↓	Obesity	[24]
MEK1/2	3T3-L1 preadipocytes	None	EBBR	12.5,25,50μM	3d	MEK1/2 phosphorylation in the early stage of differentiation↓	Obesity	[24]
	BALB/c nude mice	HCT-116 cells	Cop	150 mg/kg	25d	The expression of MEK in lungs↓	Colorectal cancer	[11]
c-Fos	Glomerular mesangial cells	High-glucose	BBR	10,30,90μM	2h	The phosphorylation of c-Fos↓	Diabetic nephropathy	[25]
	Vascularsmoothmuscle cells	Mechanical injury	BBR	120μM	1h	c-Fos expression↓	Coronary artery disease	[22]
	Vascular smooth muscle cells	None	BBR	100μM	6,12,24h	Activity of c-Fos↓	Vascular remodeling	[26]
	B16F-10 melanoma cells	TNF-α	BBR	2µg/mL	2h	c-Fos levels↓	Cancer	[27]
ASK1	Human synovial fibroblasts	CCN2	BBR	20,50,100μM	1h	The expression of ASK1↓	Osteoarthritis	[17]
Egr1	Vascularsmoothmuscle cell	Mechanical injury	BBR	120μM	1h	Egr-1 expression↓	Coronary artery disease	[22]
Cyclin D1	Vascularsmoothmuscle cell	Mechanical injury	BBR	120μM	8h	Cyclin D1 expression↓	Coronary artery disease	[22]
TAK1	SD rats	Obdominal operation	BBR	0.75,1.5mg/mL	14d	The expression of TAK1↓	Intestinal adhesion	[4]
MCP-1	NIT-1 cells	LPS	BBR	1.25,2.5,5μM	24h	The levels of MCP-1↓	Diabetes mellitus	[28]
	C57BL/6 mice	High fat diet	BBR	50mg/kg/d	14d	MCP-1 levels in adipose tissue↓	Insulin resistance	[1]
	Microglia cells	Aβ	BBR	1,2.5,5μM	30min	MCP-1 production↓	Alzheimer's disease	[15]
	ARPE-19 Cells	TNF-α	BBR	25μM	30min	The protein and mRNA levels of MCP-1↓	Intraocular inflammation	[6]
CREB	Mesangial cells	High glucose	BBR	30,90μM	24h	phospho-CREB levels↓	Diabetic nephropathy	[14]
	ICR mice	Ovariectomy	BBR	5.0,10.0mg/kg	7d	The pCREB/CREB ratios↑	Depression	[29]
	B16F-10 melanoma cells	TNF-α	BBR	2μg/mL	2h	Expression of CREB↓	Cancer	[23]
BDNF	ICR mice	Ovariectomy	BBR	5.0,10.0mg/kg	7d	Levels of BDNF↑	Depression	[29]
FN	Glomerular mesangial cells	High-glucose	BBR	10,30,90μM	2h	The expression of FN↓	Diabetic nephropathy	[25]
	Mesangial cells	High glucose	BBR	30,90μM	24h	FN protein expression↓	Diabetic nephropathy	[14]
	Rat mesangial cells	High glucose	BBR	10,30,90μM	24h	The expression of FN↓	Diabetic nephropathy	[30]
	MDA-MB231 Hs578 and TTNBC cells	None	BBR	10,25,50mM	24h	FN mRNA and protein expression↓	Breast cancer	[31]
	Mesangial cells	High glucose	BBR	10,30,90μM	48h	The expression of FN↓	Diabetic nephropathy	[32]
AP-1	Rat mesangial cells	High glucose	BBR	10,30,90μM	24h	Transcription activity of AP-1↓	Diabetic nephropathy	[30]
	Mesangial cells	High glucose	BBR	10,30,90μM	6h	AP-1 activity↓	Diabetic nephropathy	[32]
	Human chondrocytes and chondrosarcoma cells	None	BBR	1,3,10,30μM	24h	AP-1 activity↓	Chondrosarcoma	[33]
	Hs578T cells	None	BBR	25,50mM	24h	AP-1 activity↓	Breast cancer	[31]
TGF-β1	Glomerular mesangial cells	High-glucose	BBR	10,30,90μM	2h	The expression of TGF-β1↓	Diabetic nephropathy	[25]
	Rat mesangial cells	High glucose	BBR	10,30,90μM	24h	The expression of TGF-β1↓	Diabetic nephropathy	[30]
	SD rats	High-fat and high-sugar diet,STZ	BBR	50,100,200mg/kg/d	8w	The levels of TGF-β1↓	Diabetic nephropathy	[34]
	Rat mesangial cells	High glucose	BBR	30,60,90µmol/L	24h	The levels of TGF-β1↓	Diabetic nephropathy	[34]
	Wistar rats	Hypercholesterolemic diet	BBR	150mg/kg	12w	The expression of TGF-β↓	Chronic kidney injury	[35]
	SD rats	Obdominal operation	BBR	0.75,1.5mg/mL	14d	The expression of TGF-β↓	Intestinal adhesion	[4]
ICAM-1	Glomerular mesangial cells	High glucose	BBR	10,30,90μM	2h	The expression of ICAM-1↓	Diabetic nephropathy	[25]
	SD rats	Obdominal operation	BBR	0.75,1.5mg/mL	14d	The expression of ICAM-1↓	Intestinal adhesion	[4]
IL-10	Wistar rats	High glucose and fat diet,STZ	BBR	375,187.5,93.75mg/kg/d	9w	IL-10 mRNA levels↑	Type 2 diabetic	[36]
	ApcMin/+ mice	High-fat diet	Pal	10,20mg/kg/d	10-22w	IL-10 in serum↓	Colorectal cancer	[37]
	ICR mice	GalN/LPS	Pal	25,50,100,200mg/kg	1h	serum IL-10↑	Hepatic failure	[38]
	Cardiac fibroblasts	Angiotensin II	BBR	20μM	48h	The protein secretion of IL-10↑	Cardiac fibrosis	[39]
IL-8	ARPE-19 cells	TNF-α	BBR	25μM	30min	The protein and mRNA levels of IL-8↓	Intraocular inflammatory	[6]
	ApcMin/+ mice	High-fat diet	Pal	10,20mg/kg/d	10-22w	IL-8 in the small intestine,colon and serum↓	Colorectal cancer	[37]
	HT-29 cells	LPS	Pal	0-100mM	6h	IL-8 levels↓	Colorectal cancer	[37]
MMPs	MDA-MB-231 cells	None	BBR	30,60,90µM	24h	Gene expression of MMP-2↓	Breast cancer	[10]
	C57BL/6 mice	B16F-10 melanoma cells	BBR	10mg/kg	10d	Expression of MMP-9 and MMP-2↓	Cancer	[23]
	MCF-7 breast cancer cells	TPA	BBR	50,100µM	24h	MMP-1 mRNA and protein expressions↓	Breast cancer	[40]
ATF-2	Wistar rats	Obese-diet and high sugar drinking	BBR	50mg/kg/d	8w	The levels of ATF-2↓	Metabolic syndrome	[19]
	B16F-10 melanoma cells	TNF-α	BBR	2μg/mL	2h	Expression of ATF-2↓	Cancer	[23]
References
1	Ye, L., et al., Inhibition of M1 macrophage activation in adipose tissue by berberine improves insulin resistance. Life Sci, 2016.166:82-91.
2	Holy, E.W., et al., Berberine, a natural lipid-lowering drug, exerts prothrombotic effects on vascular cells. J Mol Cell Cardiol, 2009.46(2):234-40.
3	Zhou, J., et al., Neuroprotective effect of berberine is mediated by MAPK signaling pathway in experimental diabetic neuropathy in rats. Eur J Pharmacol, 2016.774:87-94.
4	Zhang, Y., et al., Berberine hydrochloride prevents postsurgery intestinal adhesion and inflammation in rats. J Pharmacol Exp Ther, 2014.349(3):417-26.
5	Simoes Pires, E.N., et al., Berberine was neuroprotective against an in vitro model of brain ischemia: survival and apoptosis pathways involved. Brain Res, 2014.1557:26-33.
6	Wang, Q., et al., Effect of berberine on proinflammatory cytokine production by ARPE-19 cells following stimulation with tumor necrosis factor-alpha. Invest Ophthalmol Vis Sci, 2012.53(4):2395-402.
7	Lee, I.A., Y.J. Hyun, and D.H. Kim, Berberine ameliorates TNBS-induced colitis by inhibiting lipid peroxidation, enterobacterial growth and NF-kappaB activation. Eur J Pharmacol, 2010.648(1-3):162-70.
8	Choi, S.B., et al., Berberine inhibits inflammatory mediators and attenuates acute pancreatitis through deactivation of JNK signaling pathways. Mol Immunol, 2016.74:27-38.
9	Gao, M.Y., et al., Berberine inhibits LPS-induced TF procoagulant activity and expression through NF-kappaB/p65, Akt and MAPK pathway in THP-1 cells. Pharmacol Rep, 2014.66(3):480-4.
10	Li, X., et al., Berberine hydrochloride IL-8 dependently inhibits invasion and IL-8-independently promotes cell apoptosis in MDA-MB-231 cells. Oncol Rep, 2014.32(6):2777-88.
11	Huang, T., et al., Coptisine from Rhizoma Coptidis Suppresses HCT-116 Cells-related Tumor Growth in vitro and in vivo. Scientific Reports, 2017.7:38524.
12	Feng, M., et al., The protective effect of coptisine on experimental atherosclerosis ApoE-/- mice is mediated by MAPK/NF-κB-dependent pathway. Biomedicine & Pharmacotherapy, 2017.93:721-9.
13	Wu, J., et al., Coptisine from Coptis chinensis inhibits production of inflammatory mediators in lipopolysaccharide-stimulated RAW 264.7 murine macrophage cells. Eur J Pharmacol, 2016.780:106-14.
14	Liu, W., et al., Berberine reduces fibronectin and collagen accumulation in rat glomerular mesangial cells cultured under high glucose condition. Mol Cell Biochem, 2009.325(1-2):99-105.
15	Jia, L., et al., Berberine suppresses amyloid-beta-induced inflammatory response in microglia by inhibiting nuclear factor-kappaB and mitogen-activated protein kinase signalling pathways. J Pharm Pharmacol, 2012.64(10):1510-21.
16	Bae, J., et al., Berberine protects 6-hydroxydopamine-induced human dopaminergic neuronal cell death through the induction of heme oxygenase-1. Mol Cells, 2013.35(2):151-7.
17	Liu, S.C., et al., Berberine attenuates CCN2-induced IL-1beta expression and prevents cartilage degradation in a rat model of osteoarthritis. Toxicol Appl Pharmacol, 2015.289(1):20-9.
18	Yu, S.M., et al., Berberine induces dedifferentiation by actin cytoskeleton reorganization via phosphoinositide 3-kinase/Akt and p38 kinase pathways in rabbit articular chondrocytes. Exp Biol Med (Maywood), 2016.241(8):800-7.
19	Li, X.X., et al., Berberine attenuates vascular remodeling and inflammation in a rat model of metabolic syndrome. Biological & Pharmaceutical Bulletin, 2015.38(6):862-8.
20	Lu, D.Y., et al., Berberine suppresses neuroinflammatory responses through AMP-activated protein kinase activation in BV-2 microglia. J Cell Biochem, 2010.110(3):697-705.
21	Song, Y.C., et al., Berberine regulates melanin synthesis by activating PI3K/AKT, ERK and GSK3beta in B16F10 melanoma cells. Int J Mol Med, 2015.35(4):1011-6.
22	Liang, K.W., et al., Berberine suppresses MEK/ERK-dependent Egr-1 signaling pathway and inhibits vascular smooth muscle cell regrowth after in vitro mechanical injury. Biochem Pharmacol, 2006.71(6):806-17.
23	Hamsa, T.P. and G. Kuttan, Berberine inhibits pulmonary metastasis through down-regulation of MMP in metastatic B16F-10 melanoma cells. Phytother Res, 2012.26(4):568-78.
24	Choi, J.S., et al., Anti-adipogenic effect of epiberberine is mediated by regulation of the Raf/MEK1/2/ERK1/2 and AMPKalpha/Akt pathways. Arch Pharm Res, 2015.38(12):2153-62.
25	Yang, Z., et al., Berberine attenuates high glucose-induced fibrosis by activating the G protein-coupled bile acid receptor TGR5 and repressing the S1P2/MAPK signaling pathway in glomerular mesangial cells. Exp Cell Res, 2016.346(2):241-7.
26	Liu, S.-J., et al., Berberine suppresses in vitro migration of human aortic smooth muscle cells through the inhibitions of MMP-2/9, u-PA, AP-1, and NF-κB. BMB Reports, 2014.47(7):388-92.
27	Hamsa, T.P. and G. Kuttan, Antiangiogenic activity of berberine is mediated through the downregulation of hypoxia-inducible factor-1, VEGF, and proinflammatory mediators. Drug Chem Toxicol, 2012.35(1):57-70.
28	Wang, Y., Attenuation of berberine on lipopolysaccharide-induced inflammatory and apoptosis responses in beta-cells via TLR4-independent JNK/NF-kappaB pathway. Pharm Biol, 2013.52(4):532-8.
29	Fan, J., et al., Berberine produces antidepressant-like effects in ovariectomized mice. Sci Rep, 2017.7(1):1310.
30	Lan, T., et al., Berberine attenuates high glucose-induced proliferation and extracellular matrix accumulation in mesangial cells: involvement of suppression of cell cycle progression and NF-kappaB/AP-1 pathways. Mol Cell Endocrinol, 2014.384(1-2):109-16.
31	Jeong, Y., et al., Berberine Suppresses Fibronectin Expression through Inhibition of c-Jun Phosphorylation in Breast Cancer Cells. Journal of Breast Cancer, 2018.21(1):21.
32	Lan, T., et al., Berberine suppresses high glucose-induced TGF-beta1 and fibronectin synthesis in mesangial cells through inhibition of sphingosine kinase 1/AP-1 pathway. Eur J Pharmacol, 2012.697(1-3):165-72.
33	Wu, C.M., et al., Berberine Reduces the Metastasis of Chondrosarcoma by Modulating the alpha v beta 3 Integrin and the PKC delta , c-Src, and AP-1 Signaling Pathways. Evid Based Complement Alternat Med, 2013.2013:423164.
34	Qiu, Y.Y., L.Q. Tang, and W. Wei, Berberine exerts renoprotective effects by regulating the AGEs-RAGE signaling pathway in mesangial cells during diabetic nephropathy. Mol Cell Endocrinol, 2017.443:89-105.
35	Wan, X., et al., Berberine ameliorates chronic kidney injury caused by atherosclerotic renovascular disease through the suppression of NFkappaB signaling pathway in rats. PLoS One, 2013.8(3):e59794.
36	Gong, J., et al., Berberine Attenuates Intestinal Mucosal Barrier Dysfunction in Type 2 Diabetic Rats. Front Pharmacol, 2017.8:42.
37	Wei-Kun, M.A., et al., Palmatine fromMahonia bealeiattenuates gut tumorigenesis in ApcMin/+mice via inhibition of inflammatory cytokines. Molecular Medicine Reports, 2016.14(1):491-8.
38	Lee, W.C., et al., Palmatine attenuates d -galactosamine/lipopolysaccharide-induced fulminant hepatic failure in mice. Food & Chemical Toxicology An International Journal Published for the British Industrial Biological Research Association, 2010.48(1):222-8.
39	Ai, F., et al., Berberine regulates proliferation, collagen synthesis and cytokine secretion of cardiac fibroblasts via AMPK-mTOR-p70S6K signaling pathway. International Journal of Clinical & Experimental Pathology, 2015.8(10):12509-16.
40	Kim, S., et al., Berberine suppresses the TPA-induced MMP-1 and MMP-9 expressions through the inhibition of PKC-alpha in breast cancer cells. J Surg Res, 2012.176(1):e21-9.
