# Supplementary material for: Cellular stress response mechanisms of Rhizoma coptidis: a systematic review
Source: Chin Med. 2018 Jun 7;13:27. doi: 10.1186/s13020-018-0184-y (PMC5992750; doi:10.1186/s13020-018-0184-y)
Supplement: Supplementary file 3 — Additional file 3: Table S3. The effects of Rhizoma coptidis on AMPK pathways (↓indicates inhibition/reduction, ↑indicates increase). [file 13020_2018_184_MOESM3_ESM.xlsx]

## Sheet: Sheet1
Target	Model of Study	Model Building	Drug	Doses	Treat	Underlying Mechanisms	Disease	Ref
					Time
AMPK	H9c2 myoblast cells	Insulin	BBR	5,10,20μmol/L	24h	Activation of AMPK↑	Insulin resistance	[1]
	3T3-L1 adipocytes	Mac-CM	BBR	10µM	1h	AMPK activity↑	Insulin resistance	[2]
	L6 muscle cells	High glucose and high insulin	BBR	5μg/ml	1h	AMPK activity↑	Insulin resistance	[3]
	Wistar rats	High-fat diet,STZ	BBR	156mg/kg/d	12w	AMPK and p-AMPK expressions↑	Diabetes	[4]
	Wistar rats	High-fat chow diet,STZ	BBR	100mg/kg	16w	AMPK activation↑	Diabetic cardiomyopathy	[5]
	Wistar rats	High-fat diet,STZ	BBR	100mg/kg	7d	AMPK activity in nonischemic areas↑	Ischemia-reperfusion injury	[6]
	Neonatal rat cardiomyocytes	Hypoxia/reoxygenation	BBR	0.5,5,50μmol/L	12h	AMPK phosphorylation↑	Ischemia-reperfusion injury	[7]
	Rat cortical neurons	None	BBR	0.5,1.5,4.53μM	24h	p-AMPK/AMPK↑	Neurodegenerative diseases	[8]
	BV-2 microglia cells	None	BBR	10μM	0-120min	AMPK (Thr172) phosphorylation↑	Neuroinflammation	[9]
	3T3-L1 preadipocytes	None	BBR	5,10,15,20µM	6d	AMPK expression levels↑	Obesity	[10]
	Osteoclasts	None	BBR	0.2,0.5μM	30min	The phosphorylated and total levels of AMPK↑	Bone resorption	[11]
	Umbilical vein endothelial cells	TNF-α	BBR	5μM	8h	AMPK phosphorylation↑	Endothelial dysfunction	[12]
	KYSE-70 cells	None	BBR	50μmol/L	6,12,24h	AMPK phosphorylation at Thr172↑	Esophageal cancer	[13]
	SD rats	STZ	BBR	50,100mg/kg	2w	The p-AMPK expression↑	Diabetic neuropathy	[14]
GLUTs	3T3-L1 adipocytes	Mac-CM and insulin	BBR	10µM	1h	GLUT4 translocation↑	Insulin resistance	[2]
	Neuronal cells	OGD	BBR	10μM	2h	GLUT1 levels↑	Cerebral ischemia	[15]
	L6 muscle cells	High glucose and high insulin	BBR	5μg/ml	1h	GLUT4 translocation↑	Insulin resistance	[3]
TORC2	Wistar rats	High-fat diet,STZ	BBR	156mg/kg/d	12w	TORC2 nuclear translocation↓	Diabetes	[4]
GCK	C57BL/6 mice	Alloxan	BBR	300 mg/kg	12w	GCK activity in liver↑	Diabetes	[16]
ADIPOQ	3T3-L1 adipocytes	Mac-CM	BBR	10µM	1h	The production of ADIPOQ↑	Insulin resistance	[2]
ACC	L6 muscle cells	High glucose and high insulin	BBR	5μg/ml	1h	Phosphorylation of ACC↑	Insulin resistance	[3]
	3T3-L1 preadipocytes	None	BBR	5,10,15,20µM	6d	The mRNA levels ACC‑1↓	Obesity	[10]
	3T3-L1 preadipocytes	MIX-mediated adipocytic environment	BBR	3μM	3d	The expression of ACC↓	Obesity	[17]
PKC	HepG2 cells	None	BBR	5μg/mL	0.5,1,2,4h	PKC activity↑	Insulin resistance	[18]
	Wistar rats	Fat feeding,STZ	BBR	75,150mg/kg/d	15d	PKC activity in the liver↑	Insulin resistance	[18]
GLP-1	NCI-H716 cells	None	BBR	1,10,100µM	2h	GLP-1 secretion↑	Hyperglycemia	[19]
	NCI-H716 cells	High-glucose	BBR	1,10,100μM	2h	GLP-1 release↑	Hyperglycemia	[20]
	SD rats	None	BBR	120 mg/kg/d	5w	GLP-1 secretion↑	Hyperglycemia	[20]
	Wistar rats	High glucose and high insulin	BBR	375,187.5,93.75mg/kg/d	9w	Plasma GLP-1 concentrations↑	Type 2 diabetes	[21]
	SD rats	STZ, high-fat diet	BBR	120,240mg/kg	8w	GLP-1 levels ↑	Diabetes	[22]
GIP	Wistar rats	High glucose and high insulin	BBR	375,187.5,93.75mg/kg/d	9w	Plasma GIP concentrations↑	Type 2 diabetes	[21]
LKB1	Wistar rats	High-fat diet,STZ	BBR	156mg/kg/d	12w	LKB1 expressions↑	Diabetes	[4]
	BV-2 microglia cells	None	BBR	10μM	0–120min	LKB1(Ser428) phosphorylation↑	Neuroinflammation	[9]
PEPCK	Wistar rats	High-fat diet,STZ	BBR	156mg/kg/d	12w	Expression of PEPCK↓	Diabetes	[4]
G6Pase	Wistar rats	High-fat diet, STZ	BBR	156mg/kg/d	12w	Expression of G6Pase↓	Diabetes	[4]
PFK2	Hypertrophic H9c2 cells	Palmitate	BBR	10μM	48h	Ppfk2↑	Diabetic cardiomyopathy	[5]
eEF2	ICR mice	Ovariectomy	BBR	10mg/kg	7d	The peEF2/eEF2 ratios in the hippocampus↓	Depression	[23]
SREBP-1	3T3-L1 preadipocytes	MIX-mediated adipocytic environment	BBR	3μM	3d	The expression of SREBP1↓	Obesity	[17]
	3T3-L1 preadipocytes	None	EBBR	12.5,25,50μM	3d	SREBP-1 expression↓	Obesity	[24]
	C57BL/6 mice	High fat diet	Jat	20,100mg/kg	8w	Hepatic mRNA expression of SREBP‑1c↓	Hyperlipidemia	[25]
PPARγ	3T3-L1 preadipocytes	None	BBR	5,10,15,20µM	6d	Levels of PPARγ↓	Obesity	[10]
	3T3-L1 cells	None	BBR	12.5,25,50μM	8d	The expression of PPAR-γ↓	Obesity	[26]
	Wistar rats	Methotrexate(MTX)	BBR	25,50 mg/kg	7d	PPARγ expression in the liver↑	MTX-induced liver injury	[27]
	3T3-L1 preadipocytes	MIX-mediated adipocytic environment	BBR	3μM	3d	The protein levels PPARγ↓	Obesity	[17]
	3T3-L1 cells	None	EBBR	12.5,25,50μM	8d	The expression levels of and PPAR-γ↓	Obesity	[26]
	3T3-L1 cells	None	Cop	12.5,25,50μM	8d	The expression levels of and PPAR-γ↓	Obesity	[26]
	3T3-L1 cells	None	Pal	12.5,25,50μM	8d	The expression levels of and PPAR-γ↓	Obesity	[26]
	3T3-L1 cells	None	Mag	12.5,25,50μM	8d	The expression levels of and PPAR-γ↓	Obesity	[26]
aP2	3T3-L1 preadipocytes	MIX-mediated adipocytic environment	BBR	3μM	3d	The expression of aP2↓	Obesity	[17]
LPL	3T3-L1 pre-adipocytes	None	BBR	5,10,15,20µM	6d	The mRNA levels LPL↓	Obesity	[10]
FAS	3T3-L1 preadipocytes	None	BBR	5,10,15,20µM	6d	The mRNA levels of FAS↓	Obesity	[10]
	3T3-L1 preadipocytes	MIX-mediated adipocytic environment	BBR	3μM	3d	The expression of FAS↓	Obesity	[17]
	3T3-L1 preadipocytes	None	EBBR	12.5,25,50μM	3d	FAS expression↓	Obesity	[24]
	C57BL/6 mice	High fat diet	Jat	20,100mg/kg	8w	Hepatic mRNA expression of FAS↓	Hyperlipidemia	[25]
AS160	L6 muscle cells	High glucose,high insulin	BBR	5μg/ml	1h	AS160 phosphorylation↑	Insulin resistance	[3]
OPG	ICR mice	Bilateral ovariectomy	Pal	1,10mg/kg	12w	OPG expression↓; RANKL/OPG ratio↓	Osteoporosis	[28]
	MC3T3-E1 cells	LPS	Pal	1-100μM	24h	OPG expression↓	Osteoporosis	[28]
	Osteoblastic ST2 cells	1α,25-(OH)2D3	Pal	0-40mM	48h	The expression of OPG↓	Osteoporosis	[29]
SIRT1	db/db mice	None	BBR	50mg/kg	10w	The protein expression of SIRT1↑	Diabetic encephalopathy	[30]
References
1	Chang, W., et al., Berberine improves insulin resistance in cardiomyocytes via activation of 5'-adenosine monophosphate-activated protein kinase. Metabolism, 2013.62(8):1159-67.
2	Zhao, W., et al., Nandinine, a Derivative of Berberine, Inhibits Inflammation and Reduces Insulin Resistance in Adipocytes via Regulation of AMP-Kinase Activity. Planta Med, 2017.83(3-04):203-9.
3	Yang, Z., et al., Berberine attenuates high glucose-induced fibrosis by activating the G protein-coupled bile acid receptor TGR5 and repressing the S1P2/MAPK signaling pathway in glomerular mesangial cells. Exp Cell Res, 2016.346(2):241-7.
4	Jiang, S.J., et al., Berberine inhibits hepatic gluconeogenesis via the LKB1-AMPK-TORC2 signaling pathway in streptozotocin-induced diabetic rats. World Journal of Gastroenterology, 2015.21(25):7777-85.
5	Chang, W., et al., Berberine treatment prevents cardiac dysfunction and remodeling through activation of 5'-adenosine monophosphate-activated protein kinase in type 2 diabetic rats and in palmitate-induced hypertrophic H9c2 cells. Eur J Pharmacol, 2015.769:55-63.
6	Chang, W., et al., Berberine Pretreatment Confers Cardioprotection Against Ischemia-Reperfusion Injury in a Rat Model of Type 2 Diabetes. J Cardiovasc Pharmacol Ther, 2016.21(5):486-94.
7	Chen, K., et al., Berberine reduces ischemia/reperfusion-induced myocardial apoptosis via activating AMPK and PI3K-Akt signaling in diabetic rats. Apoptosis, 2014.19(6):946-57.
8	Lu, J., et al., Berberine regulates neurite outgrowth through AMPK-dependent pathways by lowering energy status. Exp Cell Res, 2015.334(2):194-206.
9	Lu, D.Y., et al., Berberine suppresses neuroinflammatory responses through AMP-activated protein kinase activation in BV-2 microglia. J Cell Biochem, 2010.110(3):697-705.
10	Jang, J., et al., Berberine activates AMPK to suppress proteolytic processing, nuclear translocation and target DNA binding of SREBP-1c in 3T3-L1 adipocytes. Mol Med Rep, 2017.15(6):4139-47.
11	Lee, Y.S., et al., AMP kinase acts as a negative regulator of RANKL in the differentiation of osteoclasts. Bone, 2010.47(5):926-37.
12	Caliceti, C., et al., Novel role of the nutraceutical bioactive compound berberine in lectin-like OxLDL receptor 1-mediated endothelial dysfunction in comparison to lovastatin. Nutr Metab Cardiovasc Dis, 2017.27(6):552-63.
13	Jiang, S.X., et al., Berberine displays antitumor activity in esophageal cancer cells in vitro. World Journal of Gastroenterology, 2017.23(14):2511-8.
14	Yerra, V.G., et al., Adenosine monophosphate-activated protein kinase modulation by berberine attenuates mitochondrial deficits and redox imbalance in experimental diabetic neuropathy. Neuropharmacology, 2017.131:256.
15	Zhang, Q., et al., Berberine Preconditioning Protects Neurons Against Ischemia via Sphingosine-1-Phosphate and Hypoxia-Inducible Factor-1[Formula: see text]. Am J Chin Med, 2016.44(5):927-41.
16	Xie, X., et al., Berberine ameliorates hyperglycemia in alloxan-induced diabetic C57BL/6 mice through activation of Akt signaling pathway. Endocrine Journal, 2011.58(9):761-8.
17	Pham, T.P., J. Kwon, and J. Shin, Berberine exerts anti-adipogenic activity through up-regulation of C/EBP inhibitors, CHOP and DEC2. Biochem Biophys Res Commun, 2011.413(2):376-82.
18	Kong, W.J., et al., Berberine reduces insulin resistance through protein kinase C-dependent up-regulation of insulin receptor expression. Metabolism, 2009.58(1):109-19.
19	Yu, Y., et al., Berberine induces GLP-1 secretion through activation of bitter taste receptor pathways. Biochem Pharmacol, 2015.97(2):173-7.
20	Yu, Y., et al., Modulation of glucagon-like peptide-1 release by berberine: in vivo and in vitro studies. Biochem Pharmacol, 2010.79(7):1000-6.
21	Gong, J., et al., Berberine Attenuates Intestinal Mucosal Barrier Dysfunction in Type 2 Diabetic Rats. Front Pharmacol, 2017.8:42.
22	Zhang, Q., et al., Berberine moderates glucose metabolism through the GnRH-GLP-1 and MAPK pathways in the intestine. Bmc Complementary & Alternative Medicine, 2014.14(1):188.
23	Fan, J., et al., Berberine produces antidepressant-like effects in ovariectomized mice. Sci Rep, 2017.7(1):1310.
24	Choi, J.S., et al., Anti-adipogenic effect of epiberberine is mediated by regulation of the Raf/MEK1/2/ERK1/2 and AMPKalpha/Akt pathways. Arch Pharm Res, 2015.38(12):2153-62.
25	Yang, W., et al., Jatrorrhizine hydrochloride attenuates hyperlipidemia in a high-fat diet-induced obesity mouse model. Molecular Medicine Reports, 2016.14(4):3277-84.
26	Choi, J.S., et al., Coptis chinensis alkaloids exert anti-adipogenic activity on 3T3-L1 adipocytes by downregulating C/EBP-alpha and PPAR-gamma. Fitoterapia, 2014.98:199-208.
27	Mahmoud, A.M., W.G. Hozayen, and S.M. Ramadan, Berberine ameliorates methotrexate-induced liver injury by activating Nrf2/HO-1 pathway and PPARγ, and suppressing oxidative stress and apoptosis in rats. Biomedicine & pharmacotherapy, 2017.94:280.
28	Ishikawa, S., et al., Influence of Palmatine on Bone Metabolism in Ovariectomized Mice and Cytokine Secretion of Osteoblasts. Vivo, 2015.29(6):671-7.
29	Lee, J., et al., Palmatine Attenuates Osteoclast Differentiation and Function through Inhibition of Receptor Activator of Nuclear Factor-kappa B Ligand Expression in Osteoblast Cells. Biological & Pharmaceutical Bulletin, 2010.33(10):1733-9.
30	Li, H.Y., et al., Berberine Improves Diabetic Encephalopathy through SIRT1/ER Stress Pathway in db/db Mice. Rejuvenation Research, 2017.
