# Supplementary material for: Cellular stress response mechanisms of Rhizoma coptidis: a systematic review
Source: Chin Med. 2018 Jun 7;13:27. doi: 10.1186/s13020-018-0184-y (PMC5992750; doi:10.1186/s13020-018-0184-y)
Supplement: Supplementary file 5 — Additional file 5: Table S5. The effects of Rhizoma coptidis on ERS pathways (↓indicates inhibition/reduction, ↑indicates increase). [file 13020_2018_184_MOESM5_ESM.xlsx]

## Sheet: Sheet1
Target	Model of Study	Model Building	Drug	Doses	Treat	Underlying Mechanisms	Disease	Ref
					Time
PERK	Hep G2 cells	Tunicamycin	BBR	10,20μmol/L	14h	Phosphorylation of PERK↓	Diabetes	[1]
	db/db mice	None	BBR	50mg/kg	10w	PERK in the hippocampus↓	Diabetic encephalopathy	[2]
eIF2α	Hep G2 cells	Tunicamycin	BBR	10,20μmol/L	14h	Phosphorylation of eIF2α↓	Diabetes	[1]
	db/db mice	None	BBR	50mg/kg	10w	eIF‐2α in hippocampus↓	Diabetic encephalopathy	[2]
IRE‐1α	db/db mice	None	BBR	50mg/kg	10w	IRE‐1α in hippocampus↓	Diabetic encephalopathy	[2]
JNK	Hep G2 cells	Tunicamycin	BBR	10,20μmol/L	14h	The activation of JNK↓	Diabetes	[1]
	Caco-2 cells	IFN-γ/TNF-α	BBR	20μM	2h	JNK phosphorylation↓	Inflammatory bowel disease	[3]
CHOP	Podocytes	Aldosterone	BBR	75μM	48h	The expression of CHOP↓	Diabetic nephropathy	[4]
	db/db mice	None	BBR	50mg/kg	10w	CHOP in the hippocampus↓	Diabetic encephalopathy	[2]
C/EBPα	3T3-L1 preadipocytes	None	BBR	5,10,15,20µM	6d	Levels of C/EBPα↓	Obesity	[5]
	3T3-L1 cells	None	BBR	12.5,25,50μM	8d	The expression levels of C/EBPα↓	Obesity	[6]
	3T3-L1 preadipocytes	MIX-mediated adipocytic environment	BBR	3μM	3 d	The protein levels of C/EBPα↓	Obesity	[7]
	3T3-L1 cells	None	EBBR	12.5,25,50μM	8d	The expression levels of C/EBPα↓	Obesity	[6]
	3T3-L1 cells	None	Cop	12.5,25,50μM	8d	The expression levels of C/EBPα↓	Obesity	[6]
	3T3-L1 cells	None	Pal	12.5,25,50μM	8d	The expression levels of C/EBPα↓	Obesity	[6]
	3T3-L1 cells	None	Mag	12.5,25,50μM	8d	The expression levels of C/EBPα↓	Obesity	[6]
GRP78	Podocyte	Aldosterone	BBR	75μM	48h	The expression of GRP78↓	Diabetic nephropathy	[4]
	Caco-2 cells	Tunicamycin/IFN-γ/TNF-α	BBR	20μM	2h	GRP78 expression↓	Inflammatory bowel disease	[3]
ATF4	3T3-L1 preadipocytes	MIX	BBR	3μM	6,16,24h	The expression of ATF4↑	Obesity	[7]
References
1	Wang, Z.S., et al., Berberine reduces endoplasmic reticulum stress and improves insulin signal transduction in Hep G2 cells. Acta Pharmacol Sin, 2010.31(5):578-84.
2	Li, H.Y., et al., Berberine Improves Diabetic Encephalopathy through SIRT1/ER Stress Pathway in db/db Mice. Rejuvenation Research, 2017.
3	Hao, X., et al., Berberine ameliorates pro-inflammatory cytokine-induced endoplasmic reticulum stress in human intestinal epithelial cells in vitro. Inflammation, 2012.35(3):841-9.
4	Wang, B., et al., Berberine Improved Aldo-Induced Podocyte Injury via Inhibiting Oxidative Stress and Endoplasmic Reticulum Stress Pathways both In Vivo and In Vitro. Cell Physiol Biochem, 2016.39(1):217-28.
5	Jang, J., et al., Berberine activates AMPK to suppress proteolytic processing, nuclear translocation and target DNA binding of SREBP-1c in 3T3-L1 adipocytes. Mol Med Rep, 2017.15(6):4139-47.
6	Choi, J.S., et al., Coptis chinensis alkaloids exert anti-adipogenic activity on 3T3-L1 adipocytes by downregulating C/EBP-alpha and PPAR-gamma. Fitoterapia, 2014.98:199-208.
7	Pham, T.P., J. Kwon, and J. Shin, Berberine exerts anti-adipogenic activity through up-regulation of C/EBP inhibitors, CHOP and DEC2. Biochem Biophys Res Commun, 2011.413(2):376-82.
