# Supplementary material for: Cellular stress response mechanisms of Rhizoma coptidis: a systematic review
Source: Chin Med. 2018 Jun 7;13:27. doi: 10.1186/s13020-018-0184-y (PMC5992750; doi:10.1186/s13020-018-0184-y)
Supplement: Supplementary file 6 — Additional file 6: Table S6. The effects of Rhizoma coptidis on Oxidative Stress pathways (↓indicates inhibition/reduction, ↑indicates increase). [file 13020_2018_184_MOESM6_ESM.xlsx]

## Sheet: Sheet1
Target	Model of Study	Model Building	Drug	Doses	Treat	Underlying Mechanisms	Disease	Ref
					Time
ROS	NRK-52E cells,HK-2 cells	High glucose	BBR	30μM	24h	ROS production↓	Diabetic nephropathy	[1]
	SD rats	Uninephrectomized,aldosterone	BBR	150mg/kg	4w	The ROS levels↓	Diabetic nephropathy	[2]
	Podocyte	Aldosterone	BBR	75μM	48h	The ROS levels↓	Diabetic nephropathy	[2]
	SH-SY5Y cells	High glucose	BBR	0.1–10nM	24h	ROS production↓	Diabetic neuropathy	[3]
	SD rats	STZ	BBR	50,100mg/kg	2w	ROS generation↓	Diabetic neuropathy	[4]
	SH-SY5Y cells	6-OHDA	BBR	1-10µM	24h	Generation of ROS↓	Parkinson’s disease	[5]
	Human synovial fibroblasts	CCN2	BBR	20,50,100μM	1h	ROS generation↓	Osteoarthritis	[6]
	Umbilical vein endothelial cells	TNF-α,oxLDL,H2O2	BBR	5μM	24h	ROS levels↓	Endothelial dysfunction	[7]
	Huh7 cells	Free fatty acid	BBR	10µM	24h	ROS generation↓,intramitochondrial ROS↓	Hepatic steatosis	[8]
	Huh7 cells	H2O2	BBR	10µM	4h	ROS generation↓	Hepatic steatosis	[8]
	NSC34 cells	H2O2	BBR	0.1-10nM	30min	ROS production↓	Neuronal injury	[9]
Nrf2	NRK-52E cells,HK-2 cells	High glucose	BBR	10,30,90μM	24h	Nuclear Nrf2 accumulation↑	Diabetic nephropathy	[1]
	SH-SY5Y cells	High glucose	BBR	1,10nM	24h	Nrf2 expressions↑	Diabetic neuropathy	[3]
	SH-SY5Y cells	6-OHDA	BBR	10µM	24h	Nrf2 nuclear translocation↑	Parkinson’s disease	[5]
	Bain astrocytes	None	BBR	10μM	4,8,16,24h	Nrf2 translocation and DNA binding activity↑	Bain infections	[10]
	NSC34 cells	None	BBR	0.1-10nM	24h	Nuclear Nrf2 accumulation↑	Neuronal injury	[9]
	NSC34 cells	H2O2	BBR	10nM	30min	Nuclear Nrf2↑	Neuronal injury	[9]
	Wistar rats	Methotrexate(MTX)	BBR	25,50 mg/kg	7d	Nrf2 expression in the liver↑	MTX-induced liver injury	[11]
	SD rats	STZ	BBR	50,100mg/kg	2w	Nrf2 expression↑	Diabetic neuropathy	[4]
HO-1	NRK-52E cells,HK-2 cells	High glucose	BBR	10,30,90μM	24h	HO-1 protein expression↑	Diabetic nephropathy	[3]
	SH-SY5Y cells	High glucose	BBR	1,10nM	24h	HO-1 expressions↑	Diabetic neuropathy	[3]
	SH-SY5Y cells	6-OHDA	BBR	1-10 µM	12h	HO-1 mRNA and protein expressions↑	Parkinson’s disease	[5]
	Bain astrocytes	None	BBR	1,3,10μM	2,4,8,24h	HO-1 mRNA and protein expressions↑	Bain infections	[10]
	Peritoneal macrophages	None	BBR	1,5,10μM	1h	HO-1 mRNA and protein expressions↑	Inflamation	[12]
	NSC34 cells	None	BBR	0.1–10nM	24h	HO-1 induction↑	Neuronal injury	[9]
	Wistar rats	Methotrexate(MTX)	BBR	25,50mg/kg	7d	HO-1 expression in the liver↑	MTX-induced liver injury	[11]
	NSC34 cells	H2O2	BBR	10nM	30min	HO-1 expression↑	Neuronal injury	[9]
	Human aortic endothelial cells	None	Pal	1-10mM	8h	HO-1 protein↑	Ischemia–reperfusion injury	[13]
GSH	NRK-52E cells,HK-2 cells	High glucose	BBR	10,30,90μM	24h	GSH levels↑	Diabetic nephropathy	[1]
	Male C3H / HeN mice	TNBS	BBR	10,20mg/kg	3d	GSH content↑	Colitis	[14]
	Wistar rats	Methotrexate(MTX)	BBR	100mg/kg	10d	The expression of GSH↑	MTX induced liver injury	[15]
	NSC34 cells	None	BBR	0.1–10nM	24h	GSH levels↑	Neuronal injury	[9]
	NSC34 cells	H2O2	BBR	0.1–10nM	30min	GSH levels↑	Neuronal injury	[9]
	Kunming mice	LPS/D-GalN	Cop	37.5,150mg/kg	7d	Hepatic GSH levels↑	Liver injury	[16]
SOD	NRK-52E cells,HK-2 cells	High glucose	BBR	10,30,90 μM	24h	SOD levels↑	Diabetic nephropathy	[1]
	SD rats	STZ	BBR	50,100mg/kg	2w	SOD2 expression↑	Diabetic neuropathy	[4]
	Wistar rats	Hypercholesterolemic diet	BBR	150mg/kg	12w	SOD activity↑	Chronic kidney injury	[17]
	NSC34 cells	None	BBR	0.1-10nM	24h	SOD levels↑	Neuronal injury	[9]
	NSC34 cells	H2O2	BBR	0.1-10nM	30min	SOD levels↑	Neuronal injury	[9]
	Wistar rats	Methotrexate(MTX)	BBR	100mg/kg	10d	The expression of SOD↑	MTX induced liver injury	[15]
	Huh7 cells	Free fatty acid	BBR	10µM	24h	Mn-SOD/total SOD activity↑	Hepatic steatosis	[8]
	SD rats	30min ischemia,6h reperfusion	Pal	25,50mg/kg	1h	The activities of SOD↑	Ischemia–reperfusion injury	[13]
	Kunming mice	LPS/D-GalN	Cop	37.5,150mg/kg	7d	Hepatic SOD levels↑	Liver injury	[16]
8-OHdG	SD rats	Uninephrectomized,aldosterone	BBR	150 mg/kg	4w	8-OHdG levels↓	Diabetic nephropathy	[2]
GPx	Wistar rats	Methotrexate(MTX)	BBR	100mg/kg	10d	The expression of GPx↑	MTX induced liver injury	[15]
NQO1	SD rats	STZ	BBR	50,100mg/kg	2w	NQO1 expression↑	Diabetic neuropathy	[4]
CAT	Male C3H / HeN mice	TNBS	BBR	10,20mg/kg	3d	CAT activities↑	Colitis	[14]
	Wistar rats	Hypercholesterolemic diet	BBR	150mg/kg	12w	CAT levels↓	Chronic kidney injury	[17]
	Wistar rats	Methotrexate(MTX)	BBR	100mg/kg	10d	The expression of CAT↑	MTX induced liver injury	[15]
	SD rats	30min ischemia,6h reperfusion	Pal	25,50mg/kg	1h	CAT activity↑	Ischemia–reperfusion injury	[13]
MPO	C57BL/6 mice	CDE diet	BBR	10mg/kg	1,2,3d	MPO activity↓	Pancreatitis	[18]
	Wistar rats	Methotrexate(MTX)	BBR	100mg/kg	10d	The expression of MPO↓	MTX induced liver injury	[15]
ONOO-	LLC-PK 1 cells	SIN-1	EBBR	10μg/mL	24h	ONOO- formation↓	Free radical-induced damage	[19]
	LLC-PK 1 cells	SIN-1	Pal	10,25μg/mL	24h	ONOO- formation↓	Free radical-induced damage	[19]
	LLC-PK 1 cells	SIN-1	Mag	25μg/mL	24h	ONOO- formation↓	Free radical-induced damage	[19]
	LLC-PK 1 cells	SIN-1	Jat	10μg/mL	24h	ONOO- formation↓	Free radical-induced damage	[19]
	LLC-PK 1 cells	SIN-1	Cop	10,25μg/mL	24h	ONOO- formation↓	Free radical-induced damage	[19]
NOX2	Umbilical vein endothelial cells	TNF-α	BBR	5μM	8h	NOX2 gene expression↓	Endothelial dysfunction	[7]
	Huh7 cells	Free fatty acid	BBR	10µM	24h	mRNA and protein expressions of NOX2↓	Hepatic steatosis	[8]
Cytc	NRK-52E cells,HK-2 cells	High glucose	BBR	10,30,90μM	24h	The expression of cytochrome c↓	Diabetic nephropathy	[1]
	SH-SY5Y cells	High glucose	BBR	0.1–10nM	24h	Cytochrome c release↓	Diabetic neuropathy	[3]
References
1	Zhang, X., et al., Berberine activates Nrf2 nuclear translocation and inhibits apoptosis induced by high glucose in renal tubular epithelial cells through a phosphatidylinositol 3-kinase/Akt-dependent mechanism. Apoptosis, 2016.21(6):721-36.
2	Wang, B., et al., Berberine Improved Aldo-Induced Podocyte Injury via Inhibiting Oxidative Stress and Endoplasmic Reticulum Stress Pathways both In Vivo and In Vitro. Cell Physiol Biochem, 2016.39(1):217-28.
3	Hsu, Y.Y., Y.T. Tseng, and Y.C. Lo, Berberine, a natural antidiabetes drug, attenuates glucose neurotoxicity and promotes Nrf2-related neurite outgrowth. Toxicol Appl Pharmacol, 2013.272(3):787-96.
4	Yerra, V.G., et al., Adenosine monophosphate-activated protein kinase modulation by berberine attenuates mitochondrial deficits and redox imbalance in experimental diabetic neuropathy. Neuropharmacology, 2017.131:256.
5	Bae, J., et al., Berberine protects 6-hydroxydopamine-induced human dopaminergic neuronal cell death through the induction of heme oxygenase-1. Mol Cells, 2013.35(2):151-7.
6	Liu, S.C., et al., Berberine attenuates CCN2-induced IL-1beta expression and prevents cartilage degradation in a rat model of osteoarthritis. Toxicol Appl Pharmacol, 2015.289(1):20-9.
7	Caliceti, C., et al., Novel role of the nutraceutical bioactive compound berberine in lectin-like OxLDL receptor 1-mediated endothelial dysfunction in comparison to lovastatin. Nutr Metab Cardiovasc Dis, 2017.27(6):552-63.
8	Sun, Y., et al., Berberine ameliorates fatty acid-induced oxidative stress in human hepatoma cells. Scientific Reports, 2017.7(1):11340.
9	Hsu, Y.Y., et al., Berberine activates Nrf2 nuclear translocation and protects against oxidative damage via a phosphatidylinositol 3-kinase/Akt-dependent mechanism in NSC34 motor neuron-like cells. Eur J Pharm Sci, 2012.46(5):415-25.
10	Chen, J.H., et al., Berberine induces heme oxygenase-1 up-regulation through phosphatidylinositol 3-kinase/AKT and NF-E2-related factor-2 signaling pathway in astrocytes. Int Immunopharmacol, 2012.12(1):94-100.
11	Mahmoud, A.M., W.G. Hozayen, and S.M. Ramadan, Berberine ameliorates methotrexate-induced liver injury by activating Nrf2/HO-1 pathway and PPARγ, and suppressing oxidative stress and apoptosis in rats. Biomedicine & pharmacotherapy, 2017.94:280.
12	Lee, D., et al., Inhibitory effects of berberine on lipopolysaccharide-induced inducible nitric oxide synthase and the high-mobility group box 1 release in macrophages. Biochem Biophys Res Commun, 2013.431(3):506-11.
13	Youngmin, K., et al., Palmatine from Coptidis rhizoma reduces ischemia-reperfusion-mediated acute myocardial injury in the rat. Food & Chemical Toxicology, 2009.47(8):2097-102.
14	Lee, I.A., Y.J. Hyun, and D.H. Kim, Berberine ameliorates TNBS-induced colitis by inhibiting lipid peroxidation, enterobacterial growth and NF-kappaB activation. Eur J Pharmacol, 2010.648(1-3):162-70.
15	Mehrzadi, S., et al., Hepatoprotective effect of berberine against methotrexate induced liver toxicity in rats. Biomedicine & pharmacotherapy, 2017.97:233.
16	Chai, F.N., et al., Protective effect of Coptisine from Rhizoma Coptidis on LPS/D-GalN-induced acute liver failure in mice through up-regulating expression of miR-122. Biomedicine & Pharmacotherapy, 2018.98:180-90.
17	Wan, X., et al., Berberine ameliorates chronic kidney injury caused by atherosclerotic renovascular disease through the suppression of NFkappaB signaling pathway in rats. PLoS One, 2013.8(3):e59794.
18	Choi, S.B., et al., Berberine inhibits inflammatory mediators and attenuates acute pancreatitis through deactivation of JNK signaling pathways. Mol Immunol, 2016.74:27-38.
19	Yokozawa, T., et al., Protective role of Coptidis Rhizoma alkaloids against peroxynitrite-induced damage to renal tubular epithelial cells. J Pharm Pharmacol, 2005.57(3):367-74.
